# Supplementary material
Source: Springer Nature journal article supplement (https://www.springermedizin.de/resource/supplementary/12884_2013_1271_MOESM1_ESM.pdf/9459204)

gestational weight gain (gwg)

„external“ confounders

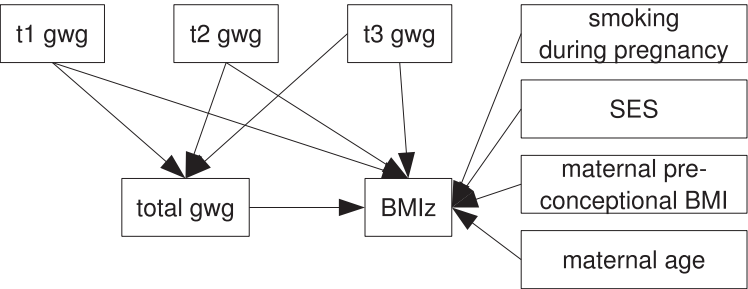

Supplement: MOESM1 [file 9459204]
